# Supplementary material for: Thermodynamics of protein denaturation at temperatures over 100 °C: CutA1 mutant proteins substituted with hydrophobic and charged residues
Source: PubMed Central journal article supplement (PMC4620440; doi:10.1038/srep15545), 2015-10-26

## Supplementary Information

Thermodynamics of protein denaturation at temperatures over 100°C: CutA1 mutant proteins substituted with hydrophobic and charged residues

Yoshinori Matsuura<sup>1</sup>, Michiyo Takehira<sup>1</sup>, Yasumasa Joti<sup>2</sup>, Kyoko Ogasahara<sup>3</sup>, Tomoyuki Tanaka<sup>1</sup>, Naoko Ono<sup>1</sup>, Naoki Kunishima<sup>1</sup>, and Katsuhide Yutani<sup>1,\*</sup>

<sup>1</sup>RIKEN SPring-8 Center, 1-1-1 Kouto, Sayo, Hyogo 679-5148, Japan

<sup>2</sup>Japan Synchrotron Radiation Research Institute, 1-1-1, Kouto, Sayo, Hyogo 679-5198, Japan

<sup>3</sup>Institute for Protein Research, Osaka University, 3-2 Yamada-oka, Suita, Osaka 565-0871, Japan

Supplementary Table 1. Denaturation temperatures of *Ec0VV* mutants in the acidic region

| Mutants                                   | pH   |      |      |      |      |      |          |
|-------------------------------------------|------|------|------|------|------|------|----------|
|                                           | 3.0  | 2.9  | 2.7  | 2.5  | 2.25 | 2.0  | 2.5-2.0* |
| <i>Ec0VV</i>                              | 85.9 | 85.0 | 82.6 | 80.6 | 80.4 | 81.0 | 80.7     |
| <i>Ec0VV_A39D/S48K</i>                    | 85.6 | 82.0 | 77.3 | 75.1 | 73.6 | 74.9 | 74.5     |
| <i>Ec0VV_H72K</i>                         | 88.7 | 87.2 | 84.5 | 83.4 | 82.5 | 83.2 | 83.0     |
| <i>Ec0VV_S82K</i>                         | 84.3 | 81.8 | 78.6 | 76.7 | 76.9 | 76.7 | 76.7     |
| <i>Ec0VV_S82R</i>                         | 83.8 | 82.2 | 79.2 | 78.1 | 78.6 | 78.0 | 78.2     |
| <i>Ec0VV_Q87K</i>                         | 83.2 | 81.1 | 78.2 | 76.6 | 76.7 | 76.9 | 76.7     |
| <i>Ec0VV_T88R</i>                         | 83.2 | 80.8 | 77.8 | 76.5 | 76.8 | 76.4 | 76.6     |
| <i>Ec0VV_S110R</i>                        | 84.2 | 82.4 | 80.1 | 78.5 | 78.3 | 79.0 | 78.6     |
| <i>Ec0VV_6</i>                            | 85.3 | 80.8 | 73.3 | 70.1 | 69.6 | 68.5 | 69.4     |
| Each data represents average of two data. |      |      |      |      |      |      |          |
| The unit of data is °C.                   |      |      |      |      |      |      |          |
| *Average value of pH 2.5, 2.25, and 2.0.  |      |      |      |      |      |      |          |

Supplementary Figure 1

The trimer crystal structure of *Ec*CutA1\_0SH (PDB ID 4Y65). Different colors represent different chains.  $\alpha$  and  $\beta$  represent  $\alpha$  helix and  $\beta$  strand, respectively. Three N terminal residues of B subunit (cyan) and eight N terminal residues of C subunit (magenta) are missing in the crystal structure.

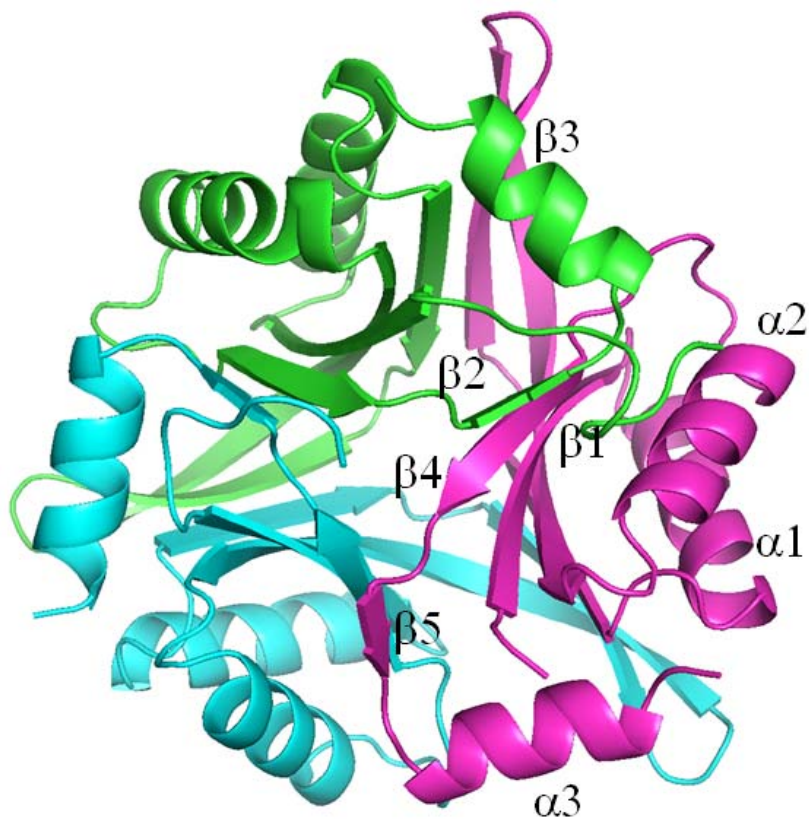

## Supplementary Figure 2

Reversibility of the DSC curves of ionic mutants from *Ec0VV* at pH 9.0. Red curves are the second runs of DSC just after cooling of the first run (black curves). Scan rates of both curves were 60°C/h

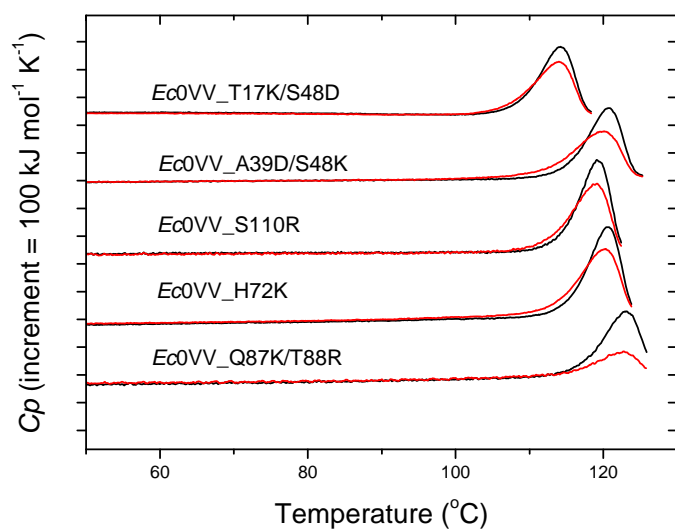

### Supplementary Figure 3

Comparison between  $T_d$  values of ionic mutants of *Ec0VV* at pH 9.0 and pH 2.0–2.5.

Open circles represent average  $T_d$  values at pH 2.0, 2.25, and 2.5 for ionic mutants of *Ec0VV* (Table S1). Closed circles represent shifted temperatures, which are the differences between the  $T_d$  values at pH 9.0 (Table 1) and the average  $T_d$  values at pH 2.0–2.5 for the ionic mutants of *Ec0VV* (Supplementary Table 1). Lines A and B represent linear regressions for open and closed circles, respectively. Numbers 1–9 represent mutant proteins of *Ec0VV*, *Ec0VV*\_6, *Ec0VV*\_A39D/S48K, *Ec0VV*\_H72K, *Ec0VV*\_S82K, *Ec0VV*\_S110R, *Ec0VV*\_S82R, *Ec0VV*\_Q87K, and *Ec0VV*\_T88R.

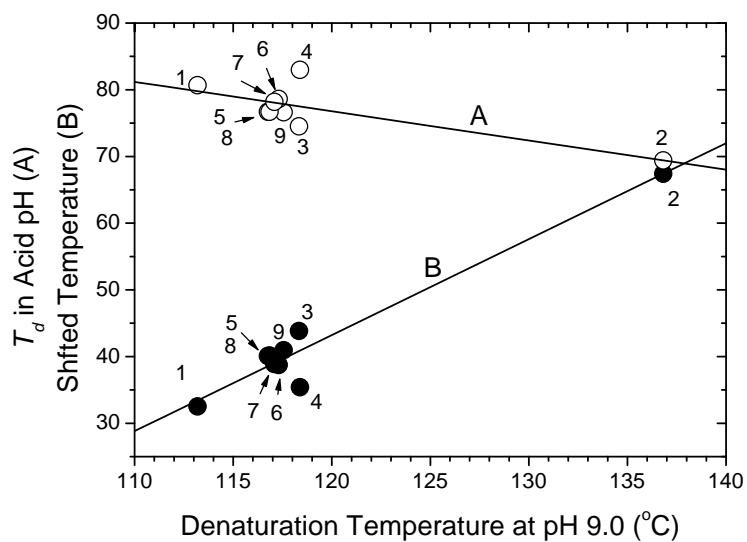

#### Supplementary Figure 4

(A) Temperature dependence of  $C_p$  for  $Ec0VV$  in the native and denatured states.

Y1 represents the temperature dependence of  $C_p$  ( $Jg^{-1}K^{-1}$ ) for  $Ec0VV$  in the denatured state. Black closed circles in Y1 represent the heat capacity of  $Ec0VV$  in the denatured state, estimated from the amino-acid composition using the parameters in Table II of Makhatadze and Privalov<sup>33</sup>. The Y1 curve is the result of fitting a secondary expression to the data. Curve  $Y1 = -1.01674 + 1.753 \times 10^{-2}T - 2.282 \times 10^{-5}T^2$ , where T is the temperature in Kelvin. Y2 represents the heat capacity in the native state; small circles represent experimental data. Each experiment comprised the six times cycles of reheating to the pre-denaturation temperature. The data points (small circles) show all data in 3 time experiments of the liner regression obtained from each experiment. The liner line in Y2 is liner regression of all data shown in the figure. Line  $Y2 = -0.56817 + 0.709 \times 10^{-2}T$ . Y3 represents the temperature function of denaturation heat capacity,  $\Delta C_p$ , between the native and denatured states, i.e.,  $Y3 = Y1 - Y2$ . Thus,  $Y3 = -0.44857 + 1.044 \times 10^{-2}T - 2.282 \times 10^{-5}T^2$ .

(B) Temperature dependence of  $C_p$  for  $Ec0VV_6$  in the native and denatured states.

Y1 represents the temperature dependence of  $C_p$  ( $Jg^{-1}K^{-1}$ ) for  $Ec0VV_6$  in the denatured state. Black closed circles and a curve in Y1 show the heat capacity of  $Ec0VV_6$  in the denatured state, estimated as shown in the legend of Supplementary Fig. 4A. Curve  $Y1 = -0.98373 + 1.735 \times 10^{-2}T - 2.25855 \times 10^{-5}T^2$ , where T is a temperature in Kelvin. Y2 represents the heat capacity in the native state, where small circles are experimental data. Each experiment comprised the six times cycles of reheating to the pre-denaturation temperature. The liner line in Y2 is liner

regression of all data shown in the figure. Line Y2 =  $-0.38148 + 0.645 \times 10^{-2}T$ . Y3 represents  $\Delta C_p$ , between the native and denatured states, i.e.,  $Y3 = Y1 - Y2$ . Thus,  $Y3 = -0.60225 + 1.09 \times 10^{-2}T - 2.2586 \times 10^{-5}T^2$ .

Fig. 4A

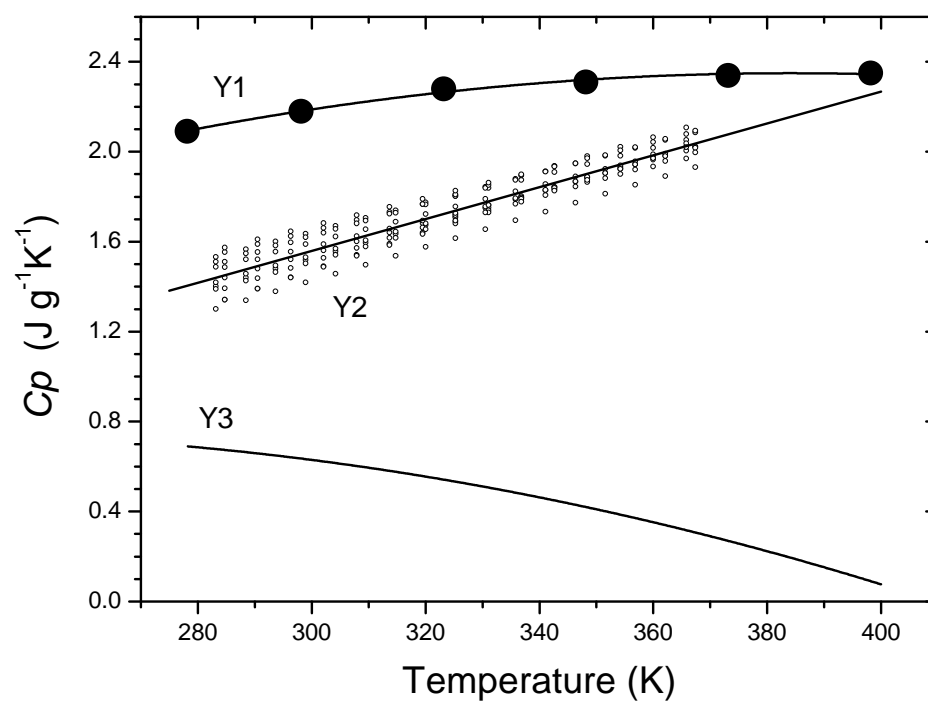

Fig. 4B

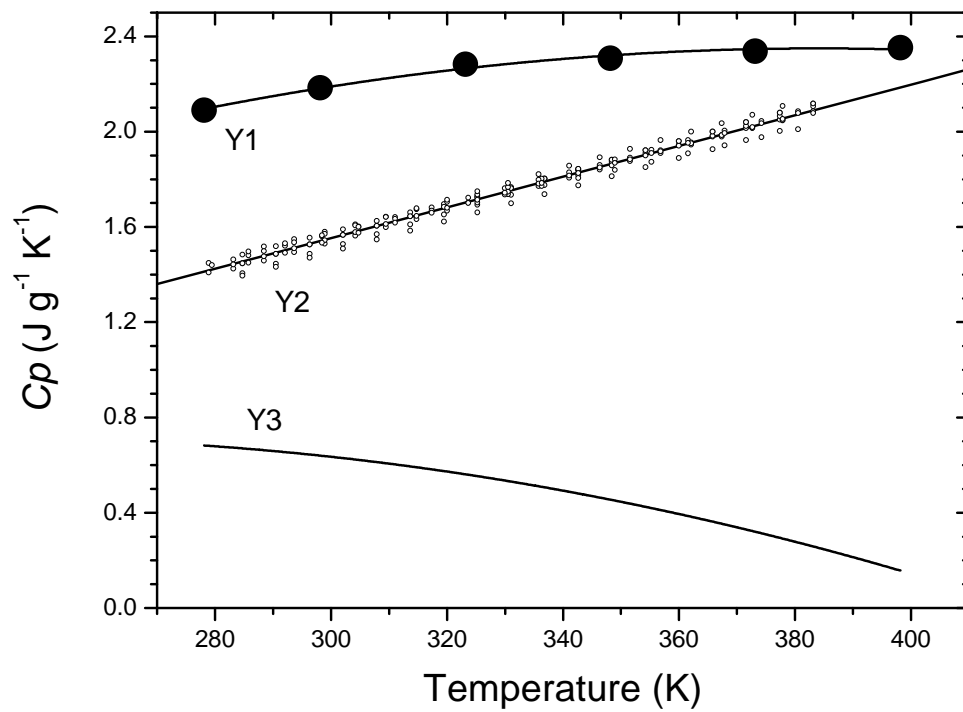

Supplement: srep15545-s1.pdf [file srep15545-s1.pdf]
